# Supplementary material for: Knowledge, attitude, and practice toward perioperative neurocognitive disorders among healthcare workers in Shandong, China: a cross-sectional study
Source: PeerJ. 2025 Dec 9;13:e20450. doi: 10.7717/peerj.20450 (PMC12700114; doi:10.7717/peerj.20450)
Supplement: Supplemental Information 8 [file peerj-13-20450-s008.xlsx]

## Sheet: 整理后（去除重复和小于90） - 副本 - 副本 (2)
No	Age	Age-Group	Gender	Residency	Education	Occupation	Professional title	Department	Work experience (years)	Work experience (years)-Group	Hospital classification	Participated in the training of PND	K1	K2	K3	K4	K5	K6	K7	K8	K9	K10	K11	K12	A1	A2	A3	A4	A5	A6	A7	P1	P2	P3	P4	P5	P6	P7	P8	P9	Kscore	Ascore	Pscore
1	30	2	0	1	1	0	1	1	2	1	2	1	1	1	1	1	1	1	0	1	0	1	1	1	5	5	5	3	4	5	5	5	5	5	5	5	5	5	5	5	10	32	45
2	27	1	1	1	3	1	1	1	1	1	3	2	1	1	0	1	1	0	1	0	1	1	1	1	4	4	4	2	2	4	3	3	1	2	2	4	3	3	3	3	9	23	24
3	37	2	0	2	2	1	1	3	14	2	3	1	0	0	0	0	0	0	0	0	0	0	0	0	4	4	4	2	4	4	4	5	5	3	5	5	3	4	4	4	0	26	38
4	38	2	1	2	2	1	2	2	16	2	3	1	1	1	1	1	1	1	0	1	0	1	1	1	5	5	5	1	1	5	5	4	4	4	4	4	4	4	4	4	10	27	36
5	29	1	0	2	2	0	1	1	7	1	3	2	1	1	1	1	0	1	1	1	1	1	1	0	5	5	5	4	5	5	5	5	5	5	5	5	5	5	5	5	10	34	45
6	23	1	0	1	2	0	1	1	2	1	3	1	1	1	1	1	1	1	1	1	0	1	1	1	5	5	5	1	1	5	5	5	5	5	5	5	5	5	5	5	11	27	45
7	21	1	0	1	1	0	1	3	0.5	1	3	2	1	0	1	1	0	1	0	1	1	1	1	0	4	4	5	1	4	3	4	4	3	4	2	3	3	3	2	2	8	25	26
8	28	1	1	2	2	1	1	2	2.5	1	3	2	1	1	1	1	1	1	1	0	0	0	0	1	5	5	5	1	1	5	5	5	5	5	5	5	5	3	5	5	8	27	43
9	26	1	1	2	2	0	1	2	5	1	3	2	1	1	1	1	1	1	1	0	1	1	1	1	5	5	5	4	4	4	5	5	5	5	5	5	4	5	5	5	11	32	44
10	53	3	0	2	2	1	3	2	34	3	3	1	1	1	1	1	1	1	1	0	0	1	1	1	5	5	5	5	5	5	5	4	3	4	3	4	3	3	3	3	10	35	30
11	37	2	0	2	2	0	2	1	11	2	3	2	1	1	1	1	1	1	0	1	0	1	1	1	5	5	5	1	1	5	5	4	4	5	5	5	5	5	5	5	10	27	43
12	37	2	1	2	3	1	2	2	10	2	3	1	1	1	1	1	1	1	1	0	1	1	1	1	5	5	5	4	4	5	5	5	5	5	4	5	3	4	5	5	11	33	41
13	25	1	0	2	3	1	1	3	0.5	1	1	2	0	0	0	0	1	1	1	0	1	0	0	0	4	4	4	2	4	2	4	3	1	1	1	5	1	1	1	1	4	24	15
14	21	1	1	2	1	0	1	1	1	1	3	2	0	0	0	0	0	0	0	0	0	0	0	0	4	4	4	2	2	4	4	5	5	5	5	5	3	5	5	5	0	24	43
15	32	2	0	2	2	0	2	1	12	2	3	2	1	1	1	0	0	0	0	0	1	0	1	1	5	5	5	4	4	2	4	4	3	4	5	5	3	4	3	4	6	29	35
16	38	2	0	2	2	0	2	2	14	2	3	2	1	1	1	0	1	1	0	1	0	0	0	1	5	5	5	1	1	5	5	5	5	5	5	5	5	5	5	5	7	27	45
17	28	1	0	1	1	0	1	3	5	1	2	1	1	0	0	1	0	1	1	0	1	0	1	1	3	3	3	2	2	4	4	5	5	3	3	3	4	4	4	4	7	21	35
18	20	1	1	1	3	1	1	3	1	1	3	2	1	1	1	0	1	1	0	1	0	1	0	1	2	5	3	2	3	4	4	5	5	5	4	4	5	5	3	4	8	23	40
19	44	3	0	2	2	0	2	2	12	2	3	1	1	1	1	1	1	1	0	1	0	1	1	1	5	5	5	4	4	5	5	5	5	5	5	5	2	5	5	5	10	33	42
20	37	2	0	2	3	1	2	2	11	2	3	2	1	1	1	1	1	0	1	0	1	1	1	1	5	5	4	1	2	5	5	5	2	5	5	5	5	5	5	3	10	27	40
21	40	2	0	2	3	1	3	3	11	2	1	2	1	1	1	1	1	1	1	1	1	1	1	1	5	5	5	4	5	5	5	5	5	5	5	5	5	5	5	5	12	34	45
22	41	3	1	1	2	1	3	2	17	2	2	2	1	1	1	1	1	1	1	1	0	1	0	1	5	5	5	5	5	5	5	5	5	5	5	5	4	5	5	3	10	35	42
23	40	2	0	2	2	1	2	2	16	2	3	2	1	1	1	1	1	1	1	0	1	1	1	1	5	4	5	2	5	4	5	4	3	3	3	3	3	3	4	4	11	30	30
24	52	3	1	2	2	1	3	3	29	3	3	2	0	0	0	0	0	0	0	0	0	0	0	0	3	3	3	3	3	3	3	1	1	1	1	3	1	1	1	1	0	21	11
25	34	2	1	2	2	1	2	2	8	1	3	1	1	0	1	0	1	1	0	1	1	0	1	1	4	5	4	3	5	5	5	5	5	5	5	5	5	5	5	5	8	31	45
26	34	2	1	2	2	0	1	1	13	2	3	2	1	1	1	1	1	1	1	1	0	0	1	0	3	3	3	3	3	3	3	3	3	3	3	3	3	3	3	3	9	21	27
27	32	2	1	2	2	1	1	2	5	1	2	2	1	1	1	1	1	1	0	1	0	1	1	1	5	5	5	1	1	5	5	4	4	4	4	4	5	4	4	4	10	27	37
28	26	1	1	2	2	0	1	1	2	1	3	1	1	0	0	0	1	1	0	0	0	0	0	0	5	1	1	1	1	1	5	5	1	5	3	4	4	3	4	5	3	15	34
29	42	3	1	2	3	1	2	1	14	2	3	2	1	1	1	1	1	0	1	1	1	1	1	1	5	4	5	4	4	5	5	4	3	2	4	4	2	3	4	3	11	32	29
30	50	3	0	2	3	1	3	2	25	3	3	2	1	1	1	1	1	1	1	1	1	1	1	1	5	5	5	5	1	5	5	5	5	5	5	5	5	5	5	5	12	31	45
31	46	3	0	2	2	1	3	1	25	3	2	2	1	1	0	1	0	1	1	1	1	1	1	1	5	5	5	5	5	5	5	3	3	3	3	5	3	4	5	3	10	35	32
32	25	1	1	1	3	1	1	3	2	1	3	2	1	1	1	1	1	0	1	1	1	1	1	1	5	5	5	1	5	4	4	5	5	4	4	4	4	5	4	4	11	29	39
33	28	1	0	1	2	0	1	2	3	1	3	1	1	1	1	1	1	1	1	1	0	1	1	1	5	5	5	5	5	5	5	5	5	5	5	5	5	5	5	5	11	35	45
34	35	2	1	2	2	1	2	2	13	2	3	1	1	1	1	1	1	1	0	1	1	1	1	1	5	5	5	5	5	5	5	5	5	5	5	5	5	5	5	5	11	35	45
35	34	2	0	2	2	0	2	2	10	2	2	2	1	1	1	1	1	1	0	1	1	1	1	1	5	5	5	1	1	5	5	5	5	5	5	5	5	5	5	5	11	27	45
36	25	1	0	2	2	0	1	1	3	1	3	1	1	1	1	1	1	1	1	0	1	1	0	1	5	5	5	4	4	5	5	5	5	5	5	5	4	5	5	5	10	33	44
37	33	2	1	2	2	1	1	3	8	1	2	2	0	0	0	0	0	0	0	0	0	0	0	0	5	5	4	2	2	4	4	1	1	1	1	1	1	1	2	1	0	26	10
38	27	1	1	2	2	0	1	1	2	1	3	1	1	1	0	1	1	1	0	0	1	1	0	1	5	5	5	4	4	5	4	4	4	4	4	4	3	4	4	4	8	32	35
39	45	3	1	2	3	1	3	3	19	2	3	2	0	0	0	0	0	0	0	0	0	0	0	0	5	5	5	2	4	5	5	4	5	5	4	4	3	4	4	5	0	31	38
40	26	1	1	2	3	1	1	2	0.5	1	3	1	1	1	1	1	1	1	0	1	1	1	1	1	5	5	5	2	1	5	5	4	3	4	4	5	4	4	4	4	11	28	36
41	35	2	0	1	2	0	1	2	13	2	3	2	1	1	1	1	1	1	1	0	1	1	1	0	5	5	5	1	1	5	5	5	5	5	5	5	5	5	5	5	10	27	45
42	40	2	1	2	3	1	2	1	12	2	2	2	1	1	1	1	1	1	1	0	1	1	1	1	5	5	5	1	1	5	5	5	5	5	5	5	5	5	5	5	11	27	45
43	36	2	0	2	3	1	2	2	10	2	3	1	1	1	1	1	1	1	1	1	1	1	1	1	5	5	5	4	4	5	5	4	4	4	4	4	4	3	4	4	12	33	35
44	30	2	0	2	2	0	1	2	5	1	3	2	1	1	1	1	1	1	0	1	0	1	1	1	5	5	5	1	1	5	5	1	1	1	1	5	2	1	2	1	10	27	15
45	38	2	0	2	2	0	2	2	15	2	2	2	1	1	1	1	1	1	1	1	0	1	1	1	5	5	5	1	1	5	5	5	5	5	5	5	5	5	5	5	11	27	45
46	30	2	1	2	2	0	1	2	6	1	3	2	0	1	0	0	0	0	0	0	0	0	0	0	4	4	5	1	1	5	5	5	5	5	5	5	5	5	5	5	1	25	45
47	30	2	0	2	3	1	2	2	3	1	3	1	1	1	1	1	1	1	1	1	1	1	1	1	5	5	4	5	5	5	5	4	3	4	4	3	3	4	5	2	12	34	32
48	24	1	1	1	2	1	1	1	1	1	3	2	1	1	1	1	1	1	1	1	1	1	1	1	5	5	5	1	1	5	5	3	3	5	3	3	3	3	5	4	12	27	32
49	43	3	1	2	3	1	2	2	20	2	3	1	1	1	1	1	1	1	1	0	1	1	1	1	5	5	5	5	5	5	5	4	4	4	4	5	4	3	5	4	11	35	37
50	27	1	0	2	2	0	1	1	6	1	3	2	1	1	1	1	1	1	1	1	0	1	1	1	5	5	5	5	5	5	5	4	5	4	5	5	3	5	4	5	11	35	40
51	35	2	0	1	2	1	2	2	10	2	2	2	1	1	1	1	1	1	1	1	1	1	1	1	5	5	5	5	5	5	5	4	4	2	4	5	5	5	5	4	12	35	38
52	32	2	1	1	2	0	2	2	10	2	5	2	1	1	1	1	1	1	0	0	0	1	0	1	5	5	5	1	1	5	5	2	1	1	1	1	1	1	1	1	8	27	10
53	32	2	0	1	2	1	2	2	7	1	3	1	1	1	1	1	1	1	1	1	1	1	1	1	5	5	5	4	4	5	4	3	3	4	4	4	3	4	4	4	12	32	33
54	15	1	0	2	2	0	2	2	15	2	3	1	1	1	1	0	1	1	0	1	0	0	0	1	5	5	5	1	1	5	5	5	5	5	5	5	5	5	5	5	7	27	45
55	43	3	0	2	3	0	3	1	17	2	3	2	1	1	1	1	1	1	1	0	1	1	1	1	5	5	5	4	4	5	5	3	3	3	4	5	3	4	4	4	11	33	33
56	22	1	0	1	2	0	1	1	0.5	1	3	2	1	1	1	1	1	1	0	1	0	1	1	1	5	5	5	1	5	5	5	4	5	5	5	5	5	5	5	4	10	31	43
57	35	2	0	1	1	0	2	2	13	2	3	2	1	1	1	1	1	1	0	1	0	1	1	1	5	5	5	4	4	5	5	5	5	5	5	5	5	5	5	5	10	33	45
58	53	3	0	1	1	1	2	3	20	2	1	2	0	0	0	0	0	0	0	0	0	0	0	0	3	3	3	3	3	3	3	3	1	1	1	3	1	1	1	1	0	21	13
59	40	2	1	1	2	0	2	2	17	2	3	2	0	1	1	1	1	1	0	1	0	1	1	1	5	5	5	5	1	5	5	5	5	5	5	5	5	5	5	5	9	31	45
60	36	2	0	2	2	0	2	3	15	2	3	2	1	1	1	1	1	0	0	1	0	1	0	0	5	5	5	3	5	5	5	5	5	5	5	5	3	5	5	5	7	33	43
61	28	1	0	2	2	0	1	1	7	1	3	1	1	1	1	1	1	1	0	1	0	1	1	1	5	5	5	1	1	5	5	5	5	5	5	5	4	5	5	5	10	27	44
62	41	3	1	2	3	1	2	1	14	2	2	2	0	0	0	0	0	0	1	0	0	0	0	0	5	4	5	4	2	4	4	1	1	1	1	4	4	2	3	2	1	28	19
63	50	3	1	2	3	1	3	2	27	3	3	2	0	0	0	0	0	0	0	0	0	0	0	0	3	3	3	3	3	4	2	2	2	2	2	2	3	1	4	1	0	21	19
64	43	3	1	1	2	0	2	2	17	2	2	2	0	0	1	1	1	1	0	1	0	1	0	0	5	5	4	1	1	5	5	2	4	3	4	4	3	3	3	3	6	26	29
65	21	1	0	1	2	0	1	1	1	1	3	1	1	1	1	1	1	1	1	1	1	1	1	1	5	5	5	1	1	5	5	5	5	5	4	4	4	5	4	4	12	27	40
66	33	2	0	2	3	1	2	2	5	1	3	2	1	1	1	1	1	1	1	1	1	1	1	1	5	5	5	5	5	5	4	5	5	5	5	5	5	5	5	5	12	34	45
67	25	1	1	2	2	1	1	1	1	1	3	2	1	0	1	1	1	0	1	0	1	1	1	1	5	5	4	4	4	4	3	3	3	3	3	4	2	3	4	3	9	29	28
68	28	1	0	2	2	1	1	2	3	1	3	2	1	1	1	1	1	0	1	0	1	1	1	1	5	5	5	1	5	5	5	4	4	5	4	5	4	4	4	5	10	31	39
69	37	2	0	2	2	0	2	2	15	2	3	2	0	0	0	0	1	1	0	1	0	0	0	1	3	3	4	1	1	5	4	4	5	4	3	5	4	3	4	2	4	21	34
70	21	1	1	2	1	0	1	1	1	1	3	2	1	1	1	1	1	1	0	1	0	1	1	1	5	5	5	4	5	5	5	5	5	5	5	5	1	5	5	5	10	34	41
71	45	3	1	2	3	1	3	2	23	3	3	2	1	1	1	1	1	1	1	1	0	1	1	1	5	4	5	4	4	5	5	5	3	5	5	3	3	4	4	3	11	32	35
72	28	1	1	2	3	1	1	1	2	1	3	2	1	1	1	1	1	0	1	0	1	1	0	1	5	5	5	5	5	5	5	1	1	1	2	5	5	5	2	1	9	35	23
73	37	2	0	1	2	0	2	2	12	2	2	2	1	1	1	1	1	0	1	1	1	1	1	1	5	5	5	4	4	5	5	5	5	5	4	5	3	4	5	5	11	33	41
74	27	1	1	1	3	1	1	1	1	1	3	1	1	1	1	1	1	1	1	1	1	1	1	1	5	5	5	2	4	5	5	5	3	5	3	4	4	5	5	5	12	31	39
75	35	2	1	2	2	0	2	2	10	2	2	2	1	1	1	1	1	1	1	1	0	1	1	1	5	5	5	1	1	5	5	5	5	5	5	5	5	5	5	5	11	27	45
76	30	2	1	2	3	1	1	1	2	1	3	2	0	0	0	0	1	1	1	0	1	1	0	1	5	5	5	4	5	5	5	1	1	1	3	3	4	5	3	1	6	34	22
77	42	3	0	2	3	1	3	2	15	2	3	1	1	1	1	1	1	1	1	1	1	1	1	1	4	4	4	4	4	5	4	4	2	4	5	4	4	4	4	4	12	29	35
78	49	3	0	2	1	0	2	1	29	3	2	2	0	1	1	0	0	1	1	1	0	1	1	0	5	4	4	3	4	4	4	4	3	3	4	5	3	4	4	4	7	28	34
79	54	3	1	2	3	1	3	3	28	3	3	2	1	1	1	1	1	1	1	1	0	1	1	1	5	5	5	4	5	5	5	5	5	5	5	5	3	4	4	5	11	34	41
80	37	2	0	2	3	1	2	2	9	1	3	2	1	1	1	1	1	1	1	1	1	1	1	1	5	5	5	1	1	5	4	4	4	4	4	4	4	4	5	4	12	26	37
81	40	2	1	2	3	1	2	1	12	2	3	2	1	1	1	1	1	1	0	1	1	1	1	1	5	5	5	5	5	5	3	5	5	5	5	5	5	5	5	5	11	33	45
82	31	2	0	2	2	0	2	1	9	1	3	2	1	1	1	1	1	1	0	0	0	1	0	1	5	5	5	3	1	5	5	1	1	1	3	4	4	5	3	3	8	29	25
83	32	2	0	2	3	1	2	3	6	1	3	2	1	1	1	1	1	1	0	1	0	1	1	1	5	5	5	1	1	5	5	3	3	4	4	4	4	4	4	4	10	27	34
84	49	3	0	2	2	1	3	2	26	3	3	1	1	1	1	1	1	1	0	1	0	1	1	1	5	5	5	1	1	5	5	5	5	5	5	5	5	5	5	5	10	27	45
85	25	1	0	1	1	0	1	1	1	1	4	2	1	1	1	1	1	1	1	1	0	1	1	1	5	4	5	1	2	5	4	2	2	2	2	2	3	3	3	4	11	26	23
86	24	1	1	1	2	1	1	1	0.5	1	3	2	1	1	1	1	1	1	0	1	1	1	1	1	5	5	5	1	1	5	5	3	3	3	3	3	3	4	4	5	11	27	31
87	42	3	1	2	2	1	2	2	17	2	3	1	1	0	1	1	0	1	1	1	0	1	1	1	5	5	5	4	5	5	5	4	4	4	5	5	5	4	4	3	9	34	38
88	50	3	0	2	2	0	2	3	28	3	3	1	0	0	0	0	0	0	0	0	0	0	0	0	3	3	3	3	3	3	3	5	4	4	4	4	4	4	4	4	0	21	37
89	45	3	0	2	2	0	2	2	25	3	3	1	1	1	1	1	1	0	1	1	0	1	1	1	5	3	3	3	3	3	3	3	4	4	4	4	4	4	4	2	10	23	33
90	36	2	0	1	2	1	2	2	12	2	3	1	1	1	1	1	1	1	1	1	1	1	1	1	5	5	5	5	5	5	5	4	2	4	4	4	5	5	5	5	12	35	38
91	45	3	0	2	2	0	2	2	25	3	3	2	1	0	0	0	1	1	1	0	1	1	1	1	5	5	5	4	4	5	5	1	2	1	3	3	3	1	2	3	8	33	19
92	40	2	0	2	2	0	2	1	18	2	1	1	1	0	1	1	0	0	1	0	0	0	1	0	5	5	5	1	5	5	5	5	5	5	5	5	5	5	5	5	5	31	45
93	38	2	0	2	2	0	2	1	14	2	3	2	0	0	0	0	1	1	1	0	1	1	0	1	5	5	5	4	5	5	5	4	4	4	4	5	5	3	4	4	6	34	37
94	32	2	0	2	2	0	2	1	11	2	3	1	1	1	1	1	1	1	1	1	1	1	1	1	5	5	5	4	4	5	5	4	5	5	5	5	5	5	5	5	12	33	44
95	25	1	0	2	2	1	1	3	1	1	3	2	1	0	1	1	0	1	1	0	1	1	1	0	5	5	5	1	1	5	5	5	5	5	5	5	5	5	5	5	8	27	45
96	27	1	0	2	2	0	1	1	2	1	3	2	1	1	1	1	1	0	1	1	1	1	0	1	5	5	5	5	5	5	4	5	5	5	5	5	5	5	5	5	10	34	45
97	49	3	0	2	2	1	3	2	28	3	2	2	1	0	1	1	1	1	1	1	0	1	1	1	5	5	5	5	5	5	5	5	5	5	5	5	5	5	5	5	10	35	45
98	52	3	0	2	2	1	3	2	29	3	3	1	1	1	1	1	1	1	1	0	1	1	0	1	5	5	5	3	5	5	5	4	4	4	4	4	4	4	4	4	10	33	36
99	35	2	1	1	2	1	1	1	5	1	2	1	1	1	1	1	1	1	1	1	0	1	1	1	5	5	5	5	5	5	5	5	5	5	5	5	5	5	5	5	11	35	45
100	28	1	0	2	2	1	1	2	3	1	2	2	1	1	1	1	1	1	1	0	1	1	1	1	5	5	5	4	5	5	5	4	3	3	4	4	4	4	4	5	11	34	35
101	31	2	1	2	3	1	2	1	5	1	3	2	1	1	1	1	1	0	0	0	1	1	1	1	5	5	5	4	5	5	5	5	2	3	3	5	3	5	5	5	9	34	36
102	23	1	1	1	1	0	1	1	3	1	3	1	1	1	1	1	1	1	1	1	1	1	1	1	5	5	5	5	5	5	5	5	5	5	5	5	5	5	5	5	12	35	45
103	22	1	1	1	2	0	1	1	1	1	3	2	1	1	1	1	1	1	1	1	1	1	1	1	5	5	5	1	1	5	5	5	5	5	5	5	5	5	5	5	12	27	45
104	52	3	0	2	2	0	2	3	33	3	2	2	1	1	1	1	1	1	1	1	0	1	1	1	5	5	5	4	4	5	4	4	4	3	3	3	3	3	3	3	11	32	29
105	51	3	1	2	2	1	3	1	29	3	2	2	1	1	1	1	1	1	0	1	1	1	1	1	5	5	5	4	2	5	5	3	3	3	3	5	5	4	4	4	11	31	34
106	50	3	1	2	2	1	3	1	25	3	3	2	1	1	1	1	1	1	0	0	0	0	0	1	5	5	5	4	4	4	4	4	3	3	3	4	3	3	4	4	7	31	31
107	51	3	1	2	3	1	2	1	20	2	3	2	1	1	1	1	1	1	0	1	1	1	1	1	5	5	5	4	4	5	5	4	5	5	5	5	5	5	5	5	11	33	44
108	50	3	1	2	2	1	3	2	27	3	3	2	1	1	1	0	1	0	0	0	0	1	0	1	5	5	5	4	5	5	5	5	3	5	2	2	1	4	5	3	6	34	30
109	51	3	0	2	2	0	3	3	33	3	4	2	1	1	1	1	1	1	1	0	0	0	0	0	5	5	5	1	1	5	5	5	5	5	5	5	3	5	5	2	7	27	40
110	52	3	1	2	2	1	3	2	27	3	3	2	1	1	1	1	1	1	0	0	1	1	0	1	5	5	5	4	4	5	5	5	5	5	5	5	1	5	5	5	9	33	41
111	50	3	0	2	2	1	3	2	28	3	2	2	1	1	1	1	1	1	1	0	1	0	1	1	5	5	5	4	4	5	5	5	1	5	5	4	3	5	5	5	10	33	38
112	22	1	0	2	2	0	1	1	0.5	1	3	2	1	1	1	1	1	1	1	1	1	1	1	1	5	5	5	1	1	5	5	4	4	4	4	5	3	5	5	3	12	27	37
113	35	2	0	2	2	0	2	2	11	2	3	2	1	1	1	1	1	1	1	1	1	1	0	1	5	5	5	4	5	5	5	2	5	2	2	5	3	4	3	3	11	34	29
114	39	2	0	2	2	1	2	2	16	2	3	1	1	1	1	1	1	1	1	1	1	1	1	1	5	5	5	5	5	5	5	4	3	3	4	5	5	4	5	4	12	35	37
115	38	2	0	1	2	0	1	2	15	2	3	2	1	1	1	1	1	1	1	0	0	1	1	1	5	5	4	5	5	5	4	5	5	5	4	5	5	3	5	5	10	33	42
116	26	1	0	2	2	0	1	3	3	1	3	2	1	1	1	1	1	1	1	1	1	1	1	1	5	5	5	5	5	5	5	5	5	5	5	5	3	5	5	5	12	35	43
117	32	2	0	2	2	1	1	2	4	1	3	2	1	1	1	1	1	1	1	0	0	1	1	1	5	5	5	5	5	5	5	5	5	5	5	5	5	5	5	5	10	35	45
118	29	1	0	2	2	0	1	1	6	1	3	2	1	1	1	1	1	1	1	1	1	1	1	1	5	5	5	1	1	5	5	5	3	5	5	5	5	5	5	5	12	27	43
119	51	3	1	2	2	1	3	1	30	3	2	2	1	0	1	1	1	0	1	0	1	1	0	1	5	5	4	4	4	4	3	4	3	3	3	4	5	3	4	3	8	29	32
120	50	3	1	2	3	1	3	3	29	3	3	1	1	0	1	1	1	1	1	1	1	1	1	1	5	5	5	1	1	5	5	2	2	3	2	2	3	3	1	3	11	27	21
121	34	2	1	2	2	0	2	2	12	2	3	2	1	1	1	1	1	1	1	0	0	1	1	1	5	5	5	1	1	5	5	5	5	5	5	5	5	5	5	5	10	27	45
122	30	2	0	2	3	1	2	2	3	1	3	1	1	1	1	1	1	1	1	0	1	1	1	1	5	5	5	5	4	5	5	4	2	3	4	2	4	2	5	5	11	34	31
123	29	1	1	2	3	1	1	1	1	1	3	2	1	0	1	1	1	0	1	0	1	0	0	1	5	5	5	4	4	5	5	4	3	5	4	5	3	4	4	4	7	33	36
124	25	1	0	1	3	1	1	3	1	1	3	2	1	0	1	1	1	1	1	0	1	1	1	1	5	5	5	4	4	5	5	5	5	5	5	5	5	5	5	5	10	33	45
125	24	1	0	1	2	1	1	2	1	1	3	2	1	1	1	1	1	1	1	0	1	1	1	1	5	5	5	4	5	5	5	5	5	5	5	5	2	4	5	2	11	34	38
126	31	2	0	2	2	0	1	1	8	1	2	2	0	1	1	1	1	1	0	1	0	1	1	1	5	5	5	5	5	5	5	5	3	2	5	5	3	3	5	3	9	35	34
127	54	3	1	2	2	1	3	2	35	3	2	2	1	1	1	1	1	1	1	0	0	1	1	0	5	5	5	4	4	5	5	5	5	5	5	5	5	5	5	5	9	33	45
128	35	2	0	1	2	1	2	2	11	2	2	2	1	1	1	1	1	1	1	0	0	1	1	1	5	5	5	1	4	5	5	4	4	4	4	5	4	4	4	4	10	30	37
129	31	2	0	1	2	1	2	2	8	1	3	2	1	1	1	1	1	1	1	0	1	1	1	1	5	5	5	4	5	5	5	3	2	4	3	3	3	4	4	3	11	34	29
130	42	3	1	2	3	1	3	1	14	2	3	2	1	1	1	1	1	1	0	0	1	1	1	1	5	5	5	3	1	5	5	5	5	4	4	5	4	4	5	4	10	29	40
131	50	3	1	2	2	1	3	1	30	3	3	1	1	0	0	0	0	1	0	0	1	0	0	1	5	5	5	3	4	4	4	4	4	4	3	4	4	4	4	3	4	30	34
132	34	2	0	2	3	1	2	2	6	1	3	2	1	1	1	1	1	1	1	1	1	1	1	1	5	5	5	5	5	5	5	4	1	3	4	4	4	5	5	4	12	35	34
133	36	2	0	2	3	1	3	2	10	2	3	1	1	1	1	1	1	1	1	1	1	1	1	1	5	5	5	5	5	5	5	4	3	3	4	4	4	4	5	4	12	35	35
134	25	1	0	1	3	1	1	3	2	1	3	2	1	1	1	1	1	1	0	1	1	1	1	1	5	5	5	5	5	5	5	5	5	5	5	5	5	5	5	5	11	35	45
135	42	3	1	2	2	1	2	2	19	2	3	1	1	1	1	1	1	1	1	1	1	1	1	1	5	5	5	5	5	5	5	5	5	5	5	5	5	5	5	5	12	35	45
136	36	2	0	2	3	1	2	2	12	2	3	2	1	1	1	1	1	1	1	1	1	1	1	1	5	5	5	4	5	5	5	4	3	4	4	4	3	4	5	5	12	34	36
137	22	1	1	1	1	0	1	1	1	1	3	2	1	1	0	1	0	0	0	0	1	1	0	1	4	4	4	3	5	4	4	2	2	3	4	4	3	3	3	3	6	28	27
138	46	3	0	2	2	0	3	1	26	3	2	2	1	1	1	1	1	1	1	1	1	1	0	1	4	4	4	4	1	5	5	5	5	5	5	5	5	5	5	5	11	27	45
139	36	2	0	2	2	0	2	2	13	2	3	2	1	1	1	1	1	1	0	0	0	1	1	1	5	4	4	4	4	4	5	4	1	1	2	4	1	4	1	5	9	30	23
140	27	1	0	2	3	1	1	1	1	1	3	2	1	0	0	0	1	1	0	0	0	0	0	1	5	5	5	1	1	5	5	5	3	3	3	5	5	5	5	5	4	27	39
141	47	3	1	2	2	1	2	2	28	3	3	2	1	1	1	1	1	1	1	0	0	1	1	1	5	5	5	5	5	5	5	5	4	4	5	5	4	4	4	4	10	35	39
142	37	2	0	2	3	1	2	2	13	2	3	2	1	1	1	1	1	1	1	1	1	1	1	1	5	5	5	4	4	4	5	5	5	5	5	5	5	5	5	5	12	32	45
143	49	3	0	2	2	0	3	1	29	3	3	2	1	1	1	1	1	1	0	1	0	1	1	1	5	5	5	4	5	5	5	5	5	5	5	5	5	5	5	5	10	34	45
144	24	1	1	2	3	1	1	3	0.5	1	3	2	1	0	1	1	1	0	0	0	0	1	0	1	5	5	3	4	5	5	5	3	5	4	5	5	3	4	5	5	6	32	39
145	48	3	0	2	2	1	3	2	28	3	2	1	1	1	1	0	1	1	1	0	1	1	0	1	5	5	5	5	5	5	5	5	2	4	5	5	5	3	3	4	9	35	36
146	56	3	1	2	3	1	3	3	33	3	3	1	1	1	1	1	1	1	0	1	1	0	1	1	5	4	5	4	5	5	5	4	4	4	4	5	5	4	5	5	10	33	40
147	25	1	0	1	3	1	1	1	1	1	3	2	1	1	1	1	1	1	0	0	1	0	0	0	5	4	5	1	4	5	3	3	5	5	3	5	3	5	5	3	7	27	37
148	30	2	0	1	2	0	1	2	8	1	3	2	1	1	1	1	1	1	1	0	1	1	1	1	5	5	5	5	1	5	5	1	4	3	3	3	3	3	3	3	11	31	26
149	48	3	1	2	2	1	3	2	25	3	2	2	0	1	1	1	1	0	0	0	0	1	0	1	5	5	5	2	4	5	4	3	3	3	3	5	4	4	4	3	6	30	32
150	30	2	0	2	2	1	1	2	5	1	2	1	1	1	1	0	1	1	1	0	1	1	0	1	5	5	5	4	4	5	4	4	3	4	5	5	4	5	5	4	9	32	39
151	43	3	1	1	2	1	2	2	19	2	2	1	1	1	1	0	1	1	1	1	1	0	1	1	5	5	5	5	5	5	4	4	3	4	4	3	2	5	5	4	10	34	34
152	36	2	0	2	3	1	2	2	8	1	3	1	1	1	1	1	1	1	1	0	1	1	1	1	5	5	5	5	5	5	5	4	2	2	4	5	4	4	4	4	11	35	33
153	40	2	1	2	3	1	3	1	14	2	3	2	1	1	1	1	1	1	1	0	1	1	1	1	5	5	5	5	5	5	5	2	2	2	4	5	4	5	4	4	11	35	32
154	45	3	1	1	1	0	1	2	23	3	3	2	1	0	1	1	1	1	1	1	1	0	0	0	4	4	4	4	4	4	4	2	1	1	2	3	1	2	3	1	8	28	16
155	54	3	0	2	3	1	3	2	31	3	2	1	1	1	1	1	1	1	1	0	1	1	1	1	5	5	5	4	5	5	5	4	2	4	4	4	3	4	4	4	11	34	33
156	38	2	0	2	2	0	2	2	17	2	3	2	0	1	1	0	1	0	1	0	1	1	0	1	5	5	5	2	5	5	5	2	2	3	5	5	3	5	4	5	7	32	34
157	36	2	1	2	2	1	2	2	11	2	3	1	1	1	1	1	1	1	0	1	1	1	1	1	5	5	5	5	5	5	5	3	3	3	5	5	4	3	5	5	11	35	36
158	61	3	1	2	2	1	3	2	33	3	3	2	1	1	0	0	0	1	0	1	0	1	1	1	5	5	5	3	4	4	5	4	3	5	5	5	4	4	5	2	7	31	37
159	35	2	1	2	2	0	1	2	13	2	3	1	1	1	1	1	1	1	1	1	0	1	1	1	5	5	5	1	1	5	5	5	5	5	5	5	5	5	5	5	11	27	45
160	40	2	0	2	3	1	3	2	13	2	3	1	1	1	1	1	1	1	1	0	0	1	1	1	5	5	5	5	5	5	5	5	1	3	3	4	4	4	5	5	10	35	34
161	50	3	1	2	2	1	3	3	26	3	2	1	1	1	1	0	1	1	0	0	0	1	1	0	5	4	5	4	4	4	5	5	4	4	5	5	3	4	4	4	7	31	38
162	52	3	0	2	2	1	3	3	29	3	3	2	1	0	1	1	1	1	1	0	1	1	0	1	5	5	5	1	1	5	5	5	5	5	5	5	2	5	5	5	9	27	42
163	32	2	0	2	2	1	1	2	7	1	2	2	1	1	1	1	1	1	1	1	1	1	1	1	5	5	5	5	5	5	5	5	5	5	5	5	5	5	5	5	12	35	45
164	30	2	0	2	2	0	1	1	8	1	3	2	1	1	1	1	1	0	0	0	1	1	0	0	5	5	5	5	1	5	5	4	4	4	3	5	2	3	4	4	7	31	33
165	54	3	1	1	2	1	3	3	30	3	2	2	1	0	1	1	1	1	1	0	0	1	1	1	4	4	4	4	4	4	5	1	1	2	2	3	2	3	3	2	9	29	19
166	38	2	0	2	2	1	2	2	14	2	3	1	1	1	1	1	1	0	1	1	1	1	1	1	5	5	5	5	5	5	5	4	4	4	4	4	4	5	5	5	11	35	39
167	34	2	0	1	2	1	2	2	8	1	3	1	1	1	1	1	1	1	1	1	1	1	1	1	5	5	5	5	5	5	5	4	1	5	4	5	5	2	5	3	12	35	34
168	53	3	0	1	2	1	3	1	30	3	1	2	0	1	0	0	1	1	1	0	0	1	1	1	4	4	4	4	2	4	4	4	5	5	5	5	4	5	5	5	7	26	43
169	33	2	1	2	2	1	1	2	6	1	2	2	1	1	1	1	1	1	1	0	1	1	1	1	5	5	5	5	5	5	5	5	5	5	5	5	5	5	5	5	11	35	45
170	57	3	1	1	2	1	3	2	35	3	3	2	1	1	1	0	1	1	0	1	0	1	1	1	5	4	5	5	5	4	5	4	5	4	2	4	5	4	5	5	9	33	38
171	39	2	0	1	2	0	2	2	15	2	3	2	1	1	1	1	1	1	0	0	0	1	0	1	5	5	5	1	1	5	5	5	5	5	5	5	5	5	5	5	8	27	45
172	40	2	0	1	2	1	2	2	13	2	3	1	1	1	1	0	1	1	1	1	1	1	1	1	5	5	5	5	5	5	5	2	1	2	2	3	3	4	4	4	11	35	25
173	37	2	0	2	2	0	1	2	16	2	2	1	1	0	0	1	1	1	0	0	1	1	1	1	5	5	5	5	5	5	5	5	5	5	5	5	5	5	5	5	8	35	45
174	25	1	0	2	2	0	1	1	6	1	2	1	1	1	1	1	1	1	0	1	1	1	1	1	4	5	4	4	4	5	4	4	4	4	4	4	3	4	4	4	11	30	35
175	40	2	0	2	3	1	3	2	12	2	3	2	1	1	1	0	1	1	1	0	0	1	1	1	5	5	5	5	5	5	4	4	1	4	4	3	3	4	5	5	9	34	33
176	28	1	1	2	2	1	1	2	4	1	3	1	1	1	1	1	1	1	1	0	1	1	1	1	5	5	5	1	1	5	5	5	5	5	4	4	5	5	5	5	11	27	43
177	51	3	0	2	3	1	3	2	30	3	3	1	1	1	1	1	1	0	1	1	1	1	1	1	5	5	5	4	5	5	5	5	4	4	5	3	3	3	5	4	11	34	36
178	50	3	1	2	2	1	3	2	27	3	3	1	1	1	1	1	1	1	1	0	1	1	0	1	5	5	5	5	5	5	5	5	5	5	5	5	5	5	5	5	10	35	45
179	52	3	1	1	2	1	3	3	28	3	2	2	1	1	1	1	1	1	0	1	1	1	1	1	5	5	5	4	4	5	5	4	5	4	4	4	4	4	4	4	11	33	37
180	28	1	0	1	2	0	1	2	6	1	2	2	0	0	0	0	1	1	0	0	0	0	0	0	5	5	5	4	1	5	5	5	5	5	5	5	1	4	4	3	2	30	37
181	37	2	0	2	2	0	2	1	15	2	2	1	1	1	1	1	1	1	1	1	1	1	1	1	5	4	5	2	5	5	5	4	4	4	4	5	4	4	4	4	12	31	37
182	36	2	0	2	2	0	2	1	11	2	2	1	1	1	1	1	1	1	0	0	0	1	0	1	4	4	4	1	2	5	4	3	5	3	3	5	5	3	3	3	8	24	33
183	42	3	0	2	1	0	2	2	22	3	2	2	1	1	1	0	0	0	0	1	0	0	1	1	4	4	4	2	3	4	4	3	3	3	3	4	3	3	3	3	6	25	28
184	42	3	0	2	2	0	2	1	20	2	3	2	1	0	1	0	0	1	1	1	0	1	0	1	5	5	5	1	1	5	5	5	5	5	5	5	5	5	5	5	7	27	45
185	47	3	0	2	2	0	3	1	29	3	3	2	1	1	1	1	1	1	0	0	1	1	1	1	5	5	5	4	5	5	5	2	2	2	5	5	4	5	5	5	10	34	35
186	37	2	0	2	2	0	2	1	10	2	3	2	1	1	1	1	0	1	1	0	1	1	1	1	4	4	4	4	4	5	4	2	3	4	2	5	3	5	4	4	10	29	32
187	24	1	0	2	3	1	1	2	1	1	3	2	1	1	0	1	1	1	1	0	1	1	0	1	5	5	4	5	5	5	5	5	5	4	5	5	4	3	4	5	9	34	40
188	49	3	0	2	2	0	3	1	28	3	2	2	1	1	1	0	0	0	0	1	1	1	1	0	4	5	5	4	4	5	4	3	2	2	4	5	4	4	5	3	7	31	32
189	43	3	0	2	3	1	3	2	16	2	3	1	1	1	1	1	1	1	0	1	1	1	0	1	5	5	5	5	5	5	5	5	5	5	5	5	5	5	5	5	10	35	45
190	51	3	0	2	3	1	3	3	30	3	4	2	1	1	1	1	1	1	1	1	1	1	1	1	5	5	5	5	5	5	5	4	4	4	5	5	4	4	4	2	12	35	36
191	57	3	1	2	2	1	3	2	30	3	2	2	1	1	1	1	0	1	1	0	0	1	1	1	4	4	4	4	4	4	4	5	5	5	5	5	3	5	5	5	9	28	43
192	48	3	0	2	3	1	3	3	25	3	3	2	0	0	0	1	1	0	1	0	1	1	1	1	5	5	4	4	5	5	4	3	3	3	5	2	3	4	4	3	7	32	30
193	50	3	1	1	2	1	3	2	27	3	3	1	1	1	1	1	1	1	1	1	1	1	1	1	5	5	5	5	5	5	5	5	5	5	5	5	5	5	5	5	12	35	45
194	32	2	1	1	2	0	2	2	11	2	3	2	1	1	1	1	1	0	1	0	0	1	0	0	4	4	4	2	4	4	4	4	4	3	3	4	3	4	3	4	7	26	32
195	45	3	1	2	2	1	3	1	19	2	3	2	1	1	1	1	1	0	0	0	0	1	1	1	5	5	5	4	5	5	5	5	3	5	4	5	3	5	4	2	8	34	36
196	38	2	1	2	2	1	2	2	12	2	3	1	1	1	1	1	1	1	1	0	1	1	1	1	5	5	5	5	5	5	5	4	3	4	4	4	5	5	5	5	11	35	39
197	34	2	0	2	2	1	2	2	9	1	2	2	1	1	1	0	1	1	1	0	1	0	0	0	4	5	4	5	4	4	4	3	3	4	5	5	4	3	3	4	7	30	34
198	40	2	0	2	2	1	2	2	16	2	2	2	1	1	1	1	0	0	0	0	1	1	1	1	4	4	4	4	4	4	5	4	3	5	5	4	4	4	5	5	8	29	39
199	42	3	1	2	3	1	2	3	15	2	3	2	0	0	0	0	0	0	0	0	0	0	0	0	4	5	5	1	1	5	5	2	3	3	3	3	3	3	3	3	0	26	26
200	49	3	0	2	2	1	3	2	27	3	4	2	1	0	1	1	1	1	1	0	0	1	0	1	5	5	5	5	5	5	5	2	1	2	2	5	5	2	5	5	8	35	29
201	25	1	1	2	3	1	1	1	1	1	3	2	0	0	0	0	0	0	0	0	0	0	0	0	4	4	4	3	3	3	3	3	3	3	3	3	3	3	3	3	0	24	27
202	35	2	0	2	2	1	2	2	12	2	1	2	1	1	1	1	0	0	1	0	1	1	0	1	5	5	5	5	5	5	5	2	1	2	2	3	2	3	3	1	8	35	19
203	42	3	0	1	2	1	2	3	22	3	3	2	1	1	1	1	1	1	1	1	1	1	1	1	5	5	5	4	4	5	5	3	4	4	3	5	3	3	3	3	12	33	31
204	22	1	0	1	1	0	1	1	1	1	3	1	1	1	1	1	1	1	1	1	1	1	1	1	5	5	5	5	5	5	5	5	5	5	5	5	4	5	5	5	12	35	44
205	51	3	0	2	2	0	3	1	31	3	3	2	1	1	0	0	1	0	0	0	0	1	0	1	5	5	5	3	4	5	5	4	4	4	4	5	1	3	4	4	5	32	33
206	35	2	0	2	2	1	2	2	9	1	5	1	1	1	1	0	1	0	0	1	1	1	1	1	5	5	5	5	5	5	5	5	5	5	5	5	4	5	5	5	9	35	44
207	24	1	1	1	3	1	1	3	0.5	1	3	2	1	1	0	1	1	1	1	1	1	0	1	0	5	5	4	4	5	5	4	4	4	4	4	5	4	4	4	4	9	32	37
208	45	3	0	2	2	0	3	1	20	2	3	2	1	1	1	0	1	1	1	0	1	1	0	1	5	5	5	4	5	5	5	5	5	5	5	5	5	5	5	5	9	34	45
209	55	3	1	2	2	1	2	3	30	3	1	1	1	1	1	1	1	1	0	0	0	1	1	1	5	5	5	3	3	3	3	4	3	4	4	5	3	4	4	3	9	27	34
210	29	1	1	2	2	1	1	2	5	1	3	2	1	1	1	0	1	1	1	0	0	1	0	1	5	5	5	5	4	5	5	3	1	4	4	4	3	4	4	1	8	34	28
211	47	3	0	2	2	1	3	2	28	3	3	2	1	1	1	1	1	1	1	0	1	1	1	1	5	5	5	4	4	5	4	4	4	5	5	5	5	5	5	4	11	32	42
212	48	3	0	2	3	1	3	2	28	3	3	1	1	0	1	0	1	0	0	1	1	0	1	1	5	5	5	5	5	5	5	4	3	4	5	5	3	4	4	5	7	35	37
213	42	3	1	2	3	1	3	2	15	2	3	1	1	1	1	1	1	1	0	0	1	1	1	1	5	5	5	5	5	5	5	5	1	3	4	1	5	5	5	5	10	35	34
214	25	1	1	1	1	0	1	1	2	1	3	2	1	1	1	1	1	0	1	1	0	1	1	1	5	5	5	1	1	5	5	3	4	3	5	5	3	3	3	4	10	27	33
215	44	3	1	2	2	1	2	2	21	3	2	1	1	1	1	1	1	0	0	1	1	1	1	0	5	5	5	5	1	5	5	5	4	4	2	3	4	3	5	5	9	31	35
216	49	3	0	1	2	1	3	2	26	3	3	2	1	1	1	1	1	1	1	1	0	1	1	1	4	5	5	4	4	5	5	4	4	4	4	4	5	4	5	3	11	32	37
217	34	2	0	2	2	1	1	2	3	1	3	2	1	1	0	0	1	1	1	1	1	1	0	1	5	5	5	5	5	5	5	4	1	3	2	3	3	4	2	3	9	35	25
218	38	2	0	2	2	0	2	2	13	2	3	2	1	1	1	1	1	1	1	1	1	1	1	1	4	4	4	4	4	4	4	2	2	2	3	4	3	4	4	3	12	28	27
219	36	2	0	1	2	1	2	2	10	2	3	1	1	1	1	1	1	1	1	1	1	1	0	1	5	5	5	5	5	5	5	4	2	4	4	3	4	5	5	5	11	35	36
220	22	1	1	1	2	0	1	1	0.5	1	3	2	1	1	1	1	1	0	1	1	0	1	1	0	4	4	4	2	2	4	4	5	5	5	5	5	5	4	3	3	9	24	40
221	43	3	0	1	2	1	3	2	20	2	2	2	1	0	1	1	1	1	1	0	1	1	0	1	5	5	5	4	4	5	5	3	3	3	3	3	3	3	5	3	9	33	29
222	40	2	1	2	3	1	3	3	14	2	3	2	1	1	1	1	1	1	1	0	0	1	1	1	5	5	5	5	5	5	5	4	4	4	5	5	4	5	5	5	10	35	41
223	50	3	1	2	2	1	3	2	27	3	2	1	1	1	1	1	1	1	1	1	1	1	1	1	5	5	5	2	5	5	5	2	2	3	3	5	4	5	4	3	12	32	31
224	38	2	1	2	2	1	2	2	16	2	3	1	1	1	1	1	1	1	1	1	1	1	1	1	5	5	5	5	5	5	5	2	2	3	4	5	4	4	5	5	12	35	34
225	35	2	1	2	2	0	2	2	12	2	3	1	1	1	1	1	1	1	1	1	1	1	0	1	4	4	4	4	4	4	4	3	4	4	4	4	4	4	4	4	11	28	35
226	50	3	1	2	2	1	3	2	27	3	3	1	1	1	1	1	1	1	0	0	1	0	0	0	4	4	4	4	4	4	4	4	3	5	4	4	4	5	5	5	7	28	39
227	34	2	0	2	2	1	2	2	8	1	3	2	1	1	1	1	1	0	1	1	1	1	1	1	4	4	4	5	5	5	5	3	3	3	5	5	5	5	5	3	11	32	37
228	54	3	1	1	2	1	2	1	29	3	1	2	1	1	1	1	1	1	1	1	0	1	0	1	4	4	4	4	4	4	4	4	5	4	4	4	4	4	4	4	10	28	37
229	34	2	0	2	2	0	2	1	10	2	3	2	0	1	1	1	1	1	0	0	1	1	1	1	5	5	5	1	1	5	5	5	1	2	4	5	5	5	5	5	9	27	37
230	33	2	0	2	3	1	2	2	3	1	3	1	1	1	1	1	1	1	1	1	1	1	1	1	5	5	5	5	5	5	5	3	3	3	3	5	3	3	3	4	12	35	30
231	53	3	0	2	2	1	3	3	30	3	2	2	1	1	1	1	1	1	0	0	1	1	1	1	5	5	5	4	4	5	5	5	5	5	5	5	2	5	5	5	10	33	42
232	49	3	0	2	2	0	3	1	28	3	3	1	1	1	1	1	1	0	0	1	1	1	1	1	5	5	4	5	1	5	4	4	4	4	5	5	1	3	4	4	10	29	34
233	35	2	0	2	2	0	2	1	12	2	3	2	1	1	1	0	1	0	0	0	1	0	0	1	4	4	4	4	4	4	4	1	3	1	2	4	4	2	2	1	6	28	20
234	52	3	0	2	2	1	3	3	30	3	4	2	1	1	1	1	1	1	1	0	1	1	1	1	4	4	4	4	4	4	4	5	4	5	5	5	3	5	5	4	11	28	41
235	50	3	0	2	3	1	3	2	28	3	3	1	1	1	1	1	1	1	1	0	0	1	1	1	5	5	5	5	4	5	5	4	1	4	4	4	4	4	3	4	10	34	32
236	50	3	1	2	2	1	3	2	28	3	3	2	1	1	1	1	1	1	0	1	0	1	1	1	5	5	5	4	4	5	5	5	5	5	5	5	5	5	5	5	10	33	45
237	36	2	0	2	2	1	2	2	9	1	2	2	1	1	1	1	1	1	1	1	1	1	1	1	5	5	5	5	5	5	5	2	1	1	4	5	3	5	4	5	12	35	30
238	34	2	0	2	2	0	1	2	10	2	3	2	1	0	0	1	0	0	0	0	1	0	1	1	4	4	4	4	4	4	4	3	4	3	5	4	3	3	3	3	5	28	31
239	44	3	1	2	2	1	2	2	16	2	3	2	1	1	1	0	1	0	1	0	0	1	0	0	4	4	4	2	2	4	4	4	4	4	4	4	3	3	4	2	6	24	32
240	51	3	0	1	2	1	3	2	30	3	2	2	1	1	0	1	1	0	1	1	0	0	0	1	4	4	4	2	2	4	4	4	4	4	4	4	4	5	5	5	7	24	39
241	32	2	1	1	2	0	1	2	9	1	3	2	1	1	1	1	1	1	1	1	1	1	1	1	5	5	5	5	5	5	5	2	1	1	3	5	3	5	5	3	12	35	28
242	52	3	0	2	2	0	3	1	32	3	3	2	1	1	1	1	1	1	0	1	0	1	1	1	5	5	5	4	4	5	4	4	4	4	3	4	2	3	3	3	10	32	30
243	28	1	0	2	2	0	1	1	2	1	2	1	1	0	1	1	1	1	0	1	1	1	0	0	4	5	4	4	4	4	4	4	3	4	4	4	3	3	4	4	8	29	33
244	22	1	0	1	1	0	1	2	0.5	1	3	2	1	1	1	1	0	1	0	1	0	1	1	1	5	5	5	4	5	5	5	3	4	4	3	5	5	5	5	5	9	34	39
245	22	1	0	2	2	0	1	1	1	1	3	1	1	1	1	1	1	1	1	1	0	1	1	1	5	5	5	5	5	5	5	5	5	5	5	5	5	5	5	5	11	35	45
246	50	3	1	1	2	1	3	1	30	3	4	2	1	1	1	1	1	1	1	1	1	1	1	1	5	5	5	4	4	5	5	5	5	5	5	5	5	5	5	5	12	33	45
247	39	2	0	2	2	0	2	1	18	2	3	2	0	1	1	1	1	1	1	0	0	1	1	1	5	5	5	3	5	5	5	5	5	5	5	5	5	5	5	5	9	33	45
248	51	3	0	1	2	1	3	2	27	3	2	2	1	1	0	1	0	1	0	1	0	1	1	0	5	5	5	3	4	5	5	5	5	5	5	5	5	5	5	5	7	32	45
249	42	3	0	2	3	1	3	3	19	2	2	2	0	0	0	1	1	0	1	1	0	1	0	1	4	5	4	4	4	4	4	1	1	1	2	4	1	2	2	1	6	29	15
250	43	3	1	2	3	1	3	2	20	2	3	1	1	1	1	1	1	1	1	1	0	1	1	1	5	5	5	5	5	5	5	5	5	5	5	5	5	5	5	5	11	35	45
251	40	2	0	1	2	0	3	2	12	2	3	2	1	0	1	1	1	1	1	1	1	1	1	1	4	4	4	2	4	4	4	1	1	1	2	4	2	2	2	2	11	26	17
252	45	3	1	1	3	1	2	2	21	3	3	2	1	1	1	0	1	1	1	0	1	1	1	1	5	5	5	4	2	5	4	3	2	2	3	3	1	4	4	3	10	30	25
253	32	2	0	2	2	0	1	2	9	1	3	2	1	1	1	1	1	1	1	1	1	1	0	1	5	5	5	1	1	5	5	4	4	4	4	4	3	5	5	5	11	27	38
254	30	2	1	2	2	1	1	2	4	1	3	2	1	1	1	1	1	1	1	1	1	1	1	1	5	5	5	3	4	5	5	3	3	2	3	4	4	4	4	2	12	32	29
255	52	3	0	1	2	1	3	3	33	3	1	2	0	0	0	0	0	0	0	0	0	0	0	0	5	5	5	1	1	5	2	1	1	1	5	5	1	5	5	1	0	24	25
256	52	3	1	2	2	1	3	3	30	3	1	2	0	1	0	1	1	0	1	0	1	1	1	1	5	5	5	4	5	5	5	3	3	3	3	4	3	3	3	2	8	34	27
257	51	3	0	2	2	1	3	3	30	3	3	2	1	1	1	0	1	1	0	0	1	1	1	1	5	5	5	4	4	5	4	3	2	5	2	4	1	3	5	5	9	32	30
258	49	3	0	2	2	0	3	2	29	3	3	2	1	1	1	1	0	0	1	0	1	0	0	0	4	4	4	2	2	4	4	2	2	2	2	2	2	2	2	2	6	24	18
259	52	3	1	2	3	1	3	3	29	3	2	2	1	1	1	1	1	1	1	1	1	1	1	1	5	5	5	4	4	5	5	5	5	5	5	5	5	5	5	4	12	33	44
260	50	3	1	2	3	1	3	1	28	3	2	2	1	1	0	0	1	1	0	1	0	1	0	1	5	5	5	4	4	5	4	4	4	4	4	4	4	4	3	3	7	32	34
261	30	2	1	2	2	1	2	1	5	1	2	2	1	1	1	1	1	1	1	0	1	1	1	1	5	5	5	5	5	5	5	5	5	5	5	5	5	5	5	4	11	35	44
262	53	3	0	1	2	1	2	1	30	3	1	2	1	1	1	0	1	1	1	0	1	1	1	1	4	5	5	4	4	5	5	3	4	5	5	5	4	5	5	5	10	32	41
263	31	2	1	2	3	1	1	2	3	1	3	2	1	1	1	0	1	1	1	1	0	1	1	1	5	5	5	4	5	5	5	2	2	2	2	3	3	3	2	3	10	34	22
264	30	2	1	2	1	0	1	2	9	1	3	2	1	1	1	1	1	1	1	1	1	1	1	1	5	5	5	4	5	5	5	5	5	5	5	5	2	5	5	5	12	34	42
265	49	3	1	2	2	1	3	2	27	3	4	1	1	1	1	0	1	1	1	0	1	1	1	1	5	5	5	5	5	5	5	4	4	5	5	5	3	4	4	5	10	35	39
266	59	3	1	1	2	1	3	2	35	3	3	2	1	1	1	1	1	1	1	1	1	1	1	1	5	5	5	1	5	5	5	5	5	5	5	5	3	5	5	5	12	31	43
267	46	3	0	2	2	1	3	1	23	3	2	2	1	1	1	1	1	0	1	0	1	1	0	1	5	5	5	4	4	5	4	5	4	5	5	5	5	5	5	3	9	32	42
268	49	3	0	2	2	0	2	3	30	3	3	2	1	1	1	1	1	1	0	1	0	1	1	1	5	4	4	3	4	4	4	5	5	5	5	5	5	5	5	5	10	28	45
269	37	2	0	2	1	0	2	2	15	2	2	2	1	1	1	1	1	1	0	1	0	0	1	1	5	5	5	3	4	5	4	1	5	5	4	5	3	5	4	2	9	31	34
270	50	3	0	2	3	1	3	2	28	3	3	2	1	1	1	1	1	1	1	0	0	1	1	1	5	5	5	2	5	5	4	4	3	4	4	3	3	4	4	4	10	31	33
271	50	3	0	2	2	1	3	2	28	3	3	1	1	1	1	1	1	0	0	0	0	1	0	1	5	5	5	1	1	5	5	5	5	5	5	5	5	5	5	5	7	27	45
272	32	2	1	1	2	1	2	2	8	1	3	2	1	1	1	1	1	1	0	1	1	1	1	1	5	5	5	4	1	5	5	5	5	5	5	5	3	5	5	5	11	30	43
273	35	2	0	2	2	0	2	1	12	2	2	2	1	0	1	1	1	1	1	1	1	1	1	1	5	5	5	4	4	5	5	4	4	4	4	5	4	4	4	3	11	33	36
274	36	2	0	1	2	0	1	2	12	2	3	2	1	1	1	1	1	1	0	1	0	1	1	0	5	5	5	5	5	5	5	5	5	5	5	5	5	5	5	5	9	35	45
275	26	1	0	2	2	0	1	3	4	1	4	2	1	0	1	0	1	0	0	0	0	0	0	0	5	5	5	4	4	5	5	1	1	1	4	4	1	4	2	5	3	33	23
276	38	2	0	1	2	1	2	3	14	2	3	2	1	1	1	1	1	0	1	1	1	1	1	1	5	5	5	5	5	5	5	2	2	2	3	5	3	3	3	3	11	35	26
277	64	3	1	2	1	1	2	2	46	3	2	2	1	1	1	0	1	1	1	0	1	1	1	1	4	4	4	4	3	4	4	5	5	4	4	4	4	3	4	5	10	27	38
278	51	3	1	2	3	1	3	1	29	3	3	2	1	1	1	1	1	1	0	1	1	1	1	1	5	5	5	5	5	5	5	5	5	5	5	5	5	5	5	5	11	35	45
279	23	1	0	2	2	0	1	1	1	1	3	2	1	1	1	1	1	1	0	0	0	1	1	1	5	5	5	1	4	5	5	5	5	5	5	5	5	5	5	5	9	30	45
280	43	3	1	2	2	1	2	2	17	2	2	2	1	1	1	1	1	1	1	0	0	1	1	1	5	5	5	1	5	5	5	4	4	4	5	4	3	4	5	4	10	31	37
281	34	2	0	2	2	1	2	3	10	2	3	1	1	1	1	1	1	1	1	0	1	1	1	1	5	5	5	5	5	5	5	5	5	5	5	5	5	5	5	5	11	35	45
282	53	3	1	2	3	1	3	2	30	3	3	2	1	1	1	1	1	1	1	0	1	0	1	1	5	5	5	5	5	5	5	4	3	3	5	4	4	5	5	4	10	35	37
283	49	3	1	2	2	1	3	2	27	3	2	1	1	1	1	1	1	1	1	1	1	1	1	1	5	5	5	4	4	5	4	4	2	3	3	4	3	4	4	2	12	32	29
284	45	3	0	2	3	1	3	2	21	3	3	1	1	0	1	1	1	1	1	0	0	1	1	1	5	5	5	4	5	5	5	5	3	5	5	3	2	4	4	4	9	34	35
285	32	2	0	2	2	0	2	2	10	2	3	2	1	1	1	1	1	1	1	1	1	1	1	0	5	5	5	4	4	5	5	3	3	3	3	3	3	3	3	3	11	33	27
286	45	3	1	1	2	1	3	2	19	2	3	2	1	1	1	1	1	1	1	1	1	1	1	1	5	5	5	4	5	5	4	4	3	3	3	3	3	4	4	4	12	33	31
287	49	3	0	1	2	1	3	2	27	3	2	2	1	0	1	1	1	1	1	0	1	1	1	1	5	5	5	4	4	5	4	3	2	2	2	4	3	2	3	2	10	32	23
288	53	3	0	2	2	1	3	3	30	3	1	1	1	1	1	1	1	1	0	1	1	1	1	1	5	5	5	4	5	5	5	2	4	4	5	5	2	5	5	5	11	34	37
289	52	3	0	2	2	1	3	3	29	3	3	2	1	1	1	1	1	1	1	0	1	1	1	1	5	5	5	1	5	5	5	5	5	5	5	5	2	5	5	5	11	31	42
290	22	1	0	2	1	0	1	1	0.5	1	3	2	1	0	1	1	1	1	1	1	1	1	1	1	5	5	5	4	4	5	5	5	5	5	5	5	2	5	5	5	11	33	42
291	52	3	0	2	2	1	3	3	30	3	4	2	1	0	1	1	1	1	1	1	1	1	1	0	5	5	5	4	5	5	5	5	5	5	5	5	3	5	5	5	10	34	43
292	53	3	0	2	2	1	3	1	30	3	3	2	1	1	1	1	0	1	1	1	1	1	0	1	5	5	5	4	4	4	4	3	4	5	4	4	3	5	5	5	10	31	38
293	24	1	0	2	3	1	1	1	1	1	3	2	1	1	1	1	1	1	1	0	1	1	0	1	4	4	4	3	4	4	4	3	3	3	3	4	4	4	3	3	10	27	30
294	63	3	1	2	2	1	3	2	46	3	3	2	1	1	1	0	1	0	0	0	0	1	0	1	5	5	5	5	1	5	5	4	4	4	4	4	4	4	4	4	6	31	36
295	24	1	0	2	3	1	1	3	0.5	1	3	2	1	0	1	1	1	1	1	0	1	1	0	1	5	5	5	3	5	5	5	5	5	5	5	5	3	5	5	5	9	33	43
296	55	3	0	2	1	0	2	3	37	3	4	2	0	0	0	0	0	0	0	0	0	0	0	0	5	5	4	4	4	4	4	5	5	5	5	5	1	5	5	5	0	30	41
297	32	2	0	2	2	0	2	1	9	1	2	2	0	0	0	1	0	0	0	0	0	0	0	0	5	5	5	3	4	5	5	3	3	3	3	3	3	4	5	5	1	32	32
298	28	1	0	2	2	0	1	2	5	1	3	2	1	1	1	1	1	1	1	0	1	1	1	1	5	5	5	1	1	5	5	3	2	3	3	4	3	5	3	2	11	27	28
299	33	2	0	2	2	0	1	2	11	2	3	2	1	1	1	1	1	1	0	0	0	1	1	1	5	5	5	4	5	5	5	5	5	5	5	5	4	4	5	5	9	34	43
300	35	2	0	2	2	0	2	1	11	2	3	2	1	1	1	1	1	1	1	1	1	1	1	1	5	5	5	5	5	5	5	5	4	4	4	5	4	5	5	5	12	35	41
301	37	2	0	2	3	1	2	2	11	2	3	1	1	1	0	1	1	1	1	0	1	1	0	1	5	5	5	5	5	5	5	4	3	4	5	5	3	5	4	4	9	35	37
302	50	3	1	1	2	1	3	2	28	3	2	1	1	1	1	0	1	1	0	1	0	1	1	1	5	5	5	2	5	5	5	5	5	5	5	5	5	5	5	5	9	32	45
303	29	1	1	2	3	1	1	1	1	1	3	1	1	1	1	1	1	1	1	0	1	1	0	1	5	5	5	4	5	5	4	4	3	4	4	4	3	4	3	4	10	33	33
304	28	1	1	1	1	0	1	2	4	1	3	2	1	0	1	1	0	1	0	1	0	1	1	1	5	5	4	1	4	2	3	5	3	4	4	5	4	3	4	4	8	24	36
305	23	1	0	2	2	0	1	1	1.5	1	3	1	1	1	1	1	1	1	1	1	1	1	1	1	5	5	5	5	5	5	5	5	5	5	5	5	3	5	5	5	12	35	43
306	45	3	0	2	2	0	2	2	20	2	2	2	0	0	0	0	1	1	0	0	0	0	0	0	5	5	5	3	5	5	5	2	3	3	5	5	5	5	5	4	2	33	37
307	25	1	0	2	2	0	1	2	3	1	2	2	0	1	1	1	1	1	1	1	1	1	1	0	3	4	4	2	2	4	4	4	4	4	4	4	4	4	4	4	10	23	36
308	55	3	0	2	3	1	3	3	32	3	3	2	1	1	1	1	1	1	1	0	1	1	1	1	5	5	5	4	4	5	5	5	5	5	5	5	4	5	5	5	11	33	44
309	33	2	1	1	2	1	2	2	10	2	3	2	1	1	1	1	1	0	1	1	1	1	1	1	5	5	5	5	5	5	5	5	3	5	4	3	4	4	4	4	11	35	36
